# Supplementary material for: A path-based measurement for human miRNA functional similarities using miRNA-disease associations
Source: PubMed Central journal article supplement (PMC5009308; doi:10.1038/srep32533), 2016-09-02
Supplement: srep32533-s1.pdf [file srep32533-s1.pdf]

# A path-based measurement for human miRNA functional similarities using miRNA-disease associations

Pingjian Ding<sup>1</sup>, Jiawei Luo<sup>1,\*</sup>, Qiu Xiao<sup>1</sup>, and Xiangtao Chen<sup>1</sup>

<sup>1</sup>College of Computer Science and Electronic Engineering, Hunan University, Changsha, 410083, China

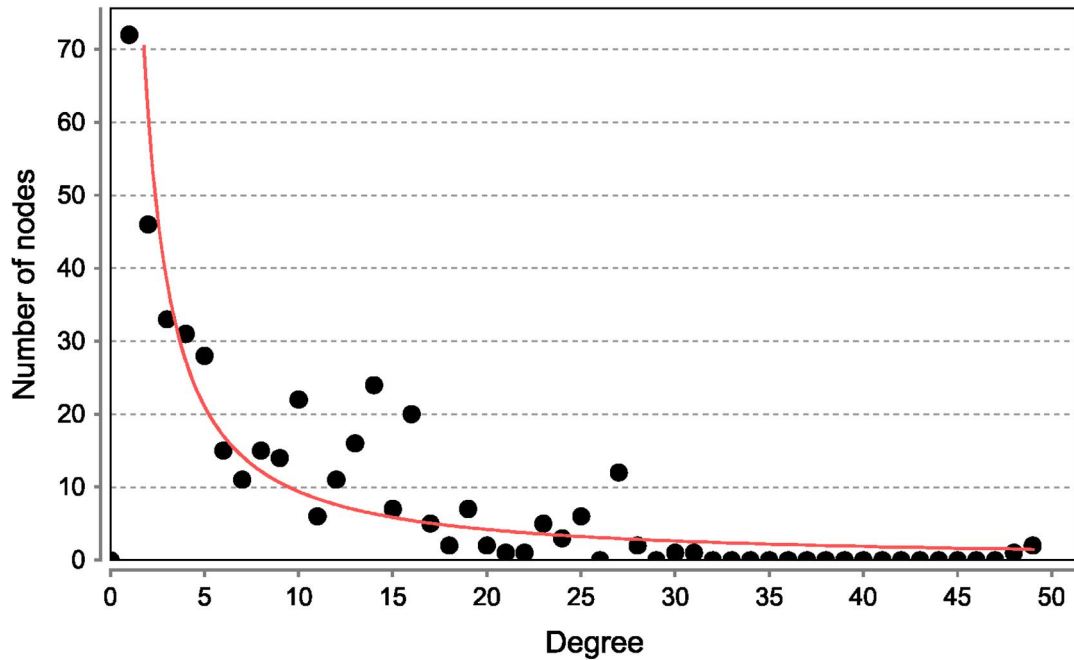

Supplementary Figure 1. Degree distribution of the miRNA functional network

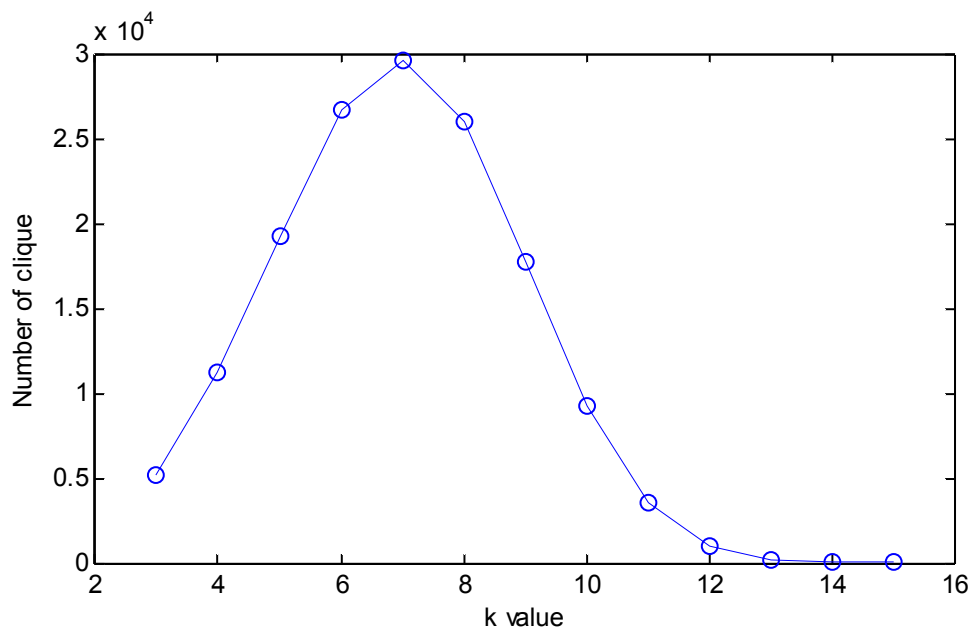

Supplementary Figure 2. Number of cliques at different k-values

Supplementary Table 1. P-values with different maximum transferring times  $b$

| $b$ | family            |                  |                  |                        | cluster           |                  |                  |                        |
|-----|-------------------|------------------|------------------|------------------------|-------------------|------------------|------------------|------------------------|
|     | Wilcoxon rank-sum |                  | Kruskal-Wallis   |                        | Wilcoxon rank-sum |                  | Kruskal-Wallis   |                        |
|     | intra-inte<br>r   | intra-rando<br>m | inter-rando<br>m | intra-inter-rand<br>om | intra-inter<br>m  | intra-rando<br>m | inter-rand<br>om | intra-inter-rando<br>m |
| 0   | 0.00E-00          | 0.00E-00         | 3.22E-04         | 0.00E-00               | 4.75E-251         | 1.16E-244        | 0.0081           | 2.01E-249              |
| 1   | 0.00E-00          | 0.00E-00         | 6.42E-04         | 0.00E-00               | 1.52E-241         | 8.69E-236        | 0.0094           | 6.31E-240              |
| 2   | 0.00E-00          | 0.00E-00         | 3.89E-04         | 0.00E-00               | 3.32E-279         | 1.51E-272        | 0.0052           | 1.48E-277              |
| 3   | 0.00E-00          | 0.00E-00         | 2.63E-04         | 0.00E-00               | 6.99E-307         | 1.47E-299        | 0.0034           | 3.28E-305              |
| 4   | 0.00E-00          | 0.00E-00         | 2.15E-04         | 0.00E-00               | 0.00E+00          | 0.00E+00         | 0.0027           | 3.3776e-319            |
| 5   | 0.00E-00          | 0.00E-00         | 1.94E-04         | 0.00E-00               | 0.00E+00          | 0.00E+00         | 0.0025           | 0.00E+00               |
| 6   | 0.00E-00          | 0.00E-00         | 1.83E-04         | 0.00E-00               | 0.00E+00          | 0.00E+00         | 0.0023           | 0.00E+00               |
| 7   | 0.00E-00          | 0.00E-00         | 1.77E-04         | 0.00E-00               | 0.00E+00          | 0.00E+00         | 0.0022           | 0.00E+00               |
| 8   | 0.00E-00          | 0.00E-00         | 1.74E-04         | 0.00E-00               | 0.00E+00          | 0.00E+00         | 0.0022           | 0.00E+00               |
| 9   | 0.00E-00          | 0.00E-00         | 1.72E-04         | 0.00E-00               | 0.00E+00          | 0.00E+00         | 0.0022           | 0.00E+00               |
| 10  | 0.00E-00          | 0.00E-00         | 1.70E-04         | 0.00E-00               | 0.00E+00          | 0.00E+00         | 0.0022           | 0.00E+00               |

Supplementary Table 2. P-values with different weight ratio  $a$

| $a$ | family            |                  |                  |                        | cluster           |                  |                  |                        |
|-----|-------------------|------------------|------------------|------------------------|-------------------|------------------|------------------|------------------------|
|     | Wilcoxon rank-sum |                  | Kruskal-Wallis   |                        | Wilcoxon rank-sum |                  | Kruskal-Wallis   |                        |
|     | intra-inte<br>r   | intra-rand<br>om | inter-rando<br>m | intra-inter-rand<br>om | intra-inter<br>om | intra-rand<br>om | Inter-rando<br>m | intra-inter-rando<br>m |
| 0.1 | 0.00E-00          | 0.00E-00         | 5.03E-04         | 0.00E-00               | 1.01E-247         | 8.07E-242        | 8.60E-03         | 4.26E-246              |
| 0.2 | 0.00E-00          | 0.00E-00         | 4.80E-04         | 0.00E-00               | 2.59E-253         | 2.81E-247        | 7.80E-03         | 1.10E-251              |
| 0.3 | 0.00E-00          | 0.00E-00         | 4.12E-04         | 0.00E-00               | 1.42E-266         | 3.20E-260        | 6.40E-03         | 6.18E-265              |
| 0.4 | 0.00E-00          | 0.00E-00         | 3.18E-04         | 0.00E-00               | 1.27E-287         | 9.22E-281        | 4.60E-03         | 5.78E-286              |
| 0.5 | 0.00E-00          | 0.00E-00         | 2.40E-04         | 0.00E-00               | 0.00E-00          | 1.00E-302        | 3.20E-03         | 0.00E-00               |
| 0.6 | 0.00E-00          | 0.00E-00         | 1.94E-04         | 0.00E-00               | 0.00E-00          | 0.00E-00         | 2.50E-03         | 0.00E-00               |
| 0.7 | 0.00E-00          | 0.00E-00         | 1.71E-04         | 0.00E-00               | 0.00E-00          | 0.00E-00         | 2.00E-03         | 0.00E-00               |
| 0.8 | 0.00E-00          | 0.00E-00         | 1.61E-04         | 0.00E-00               | 0.00E-00          | 0.00E-00         | 1.80E-03         | 0.00E-00               |
| 0.9 | 0.00E-00          | 0.00E-00         | 1.58E-04         | 0.00E-00               | 0.00E-00          | 0.00E-00         | 1.70E-03         | 0.00E-00               |
| 1.0 | 0.00E-00          | 0.00E-00         | 1.58E-04         | 0.00E-00               | 0.00E-00          | 0.00E-00         | 1.60E-03         | 0.00E-00               |
